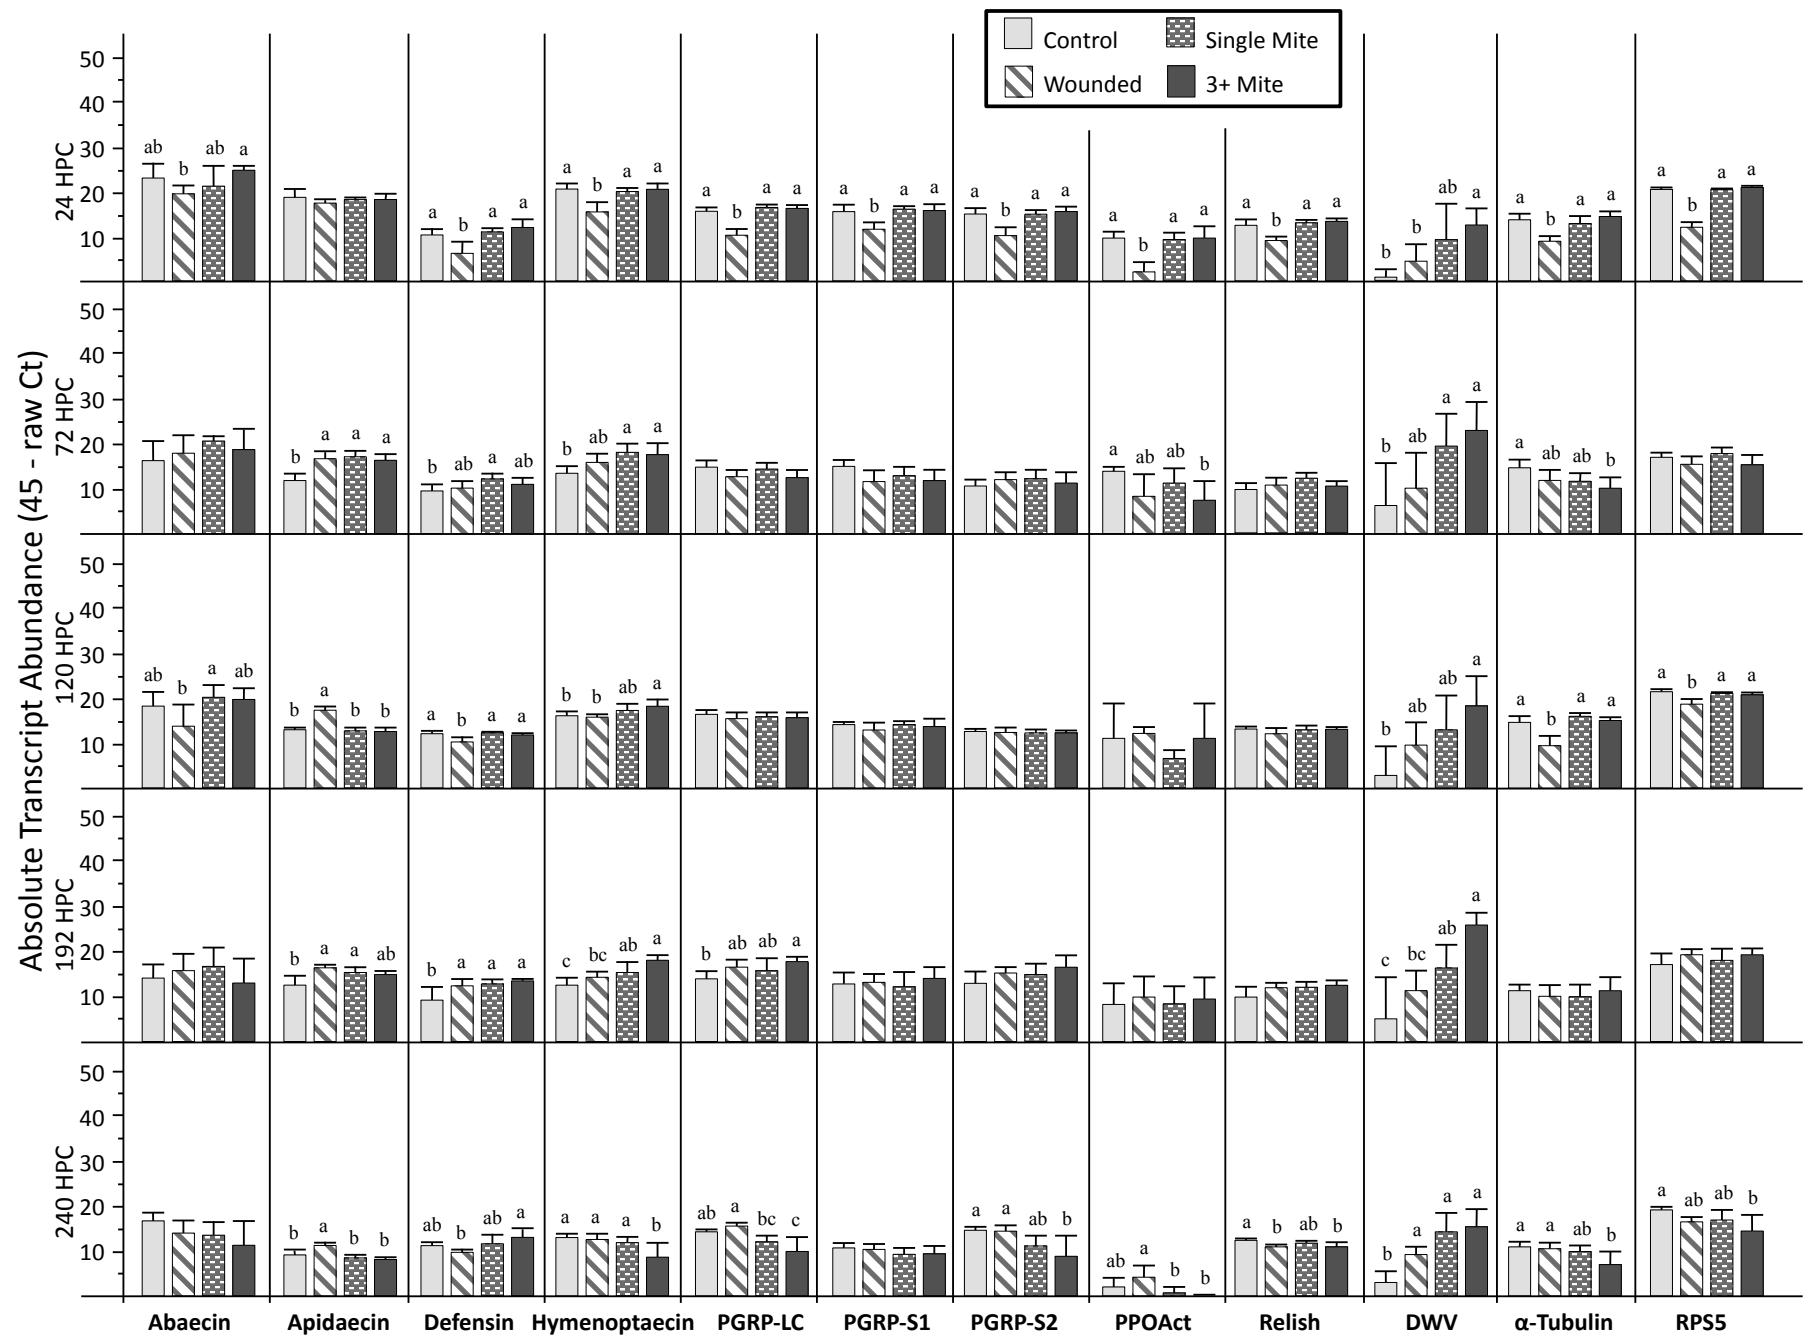

Fig. S1. Results of experimental group comparisons based on raw Ct values instead of  $\Delta$ Ct differed for most of the transcripts. Significant group differences for each transcript at each time point are indicated by letters above the respective bars.

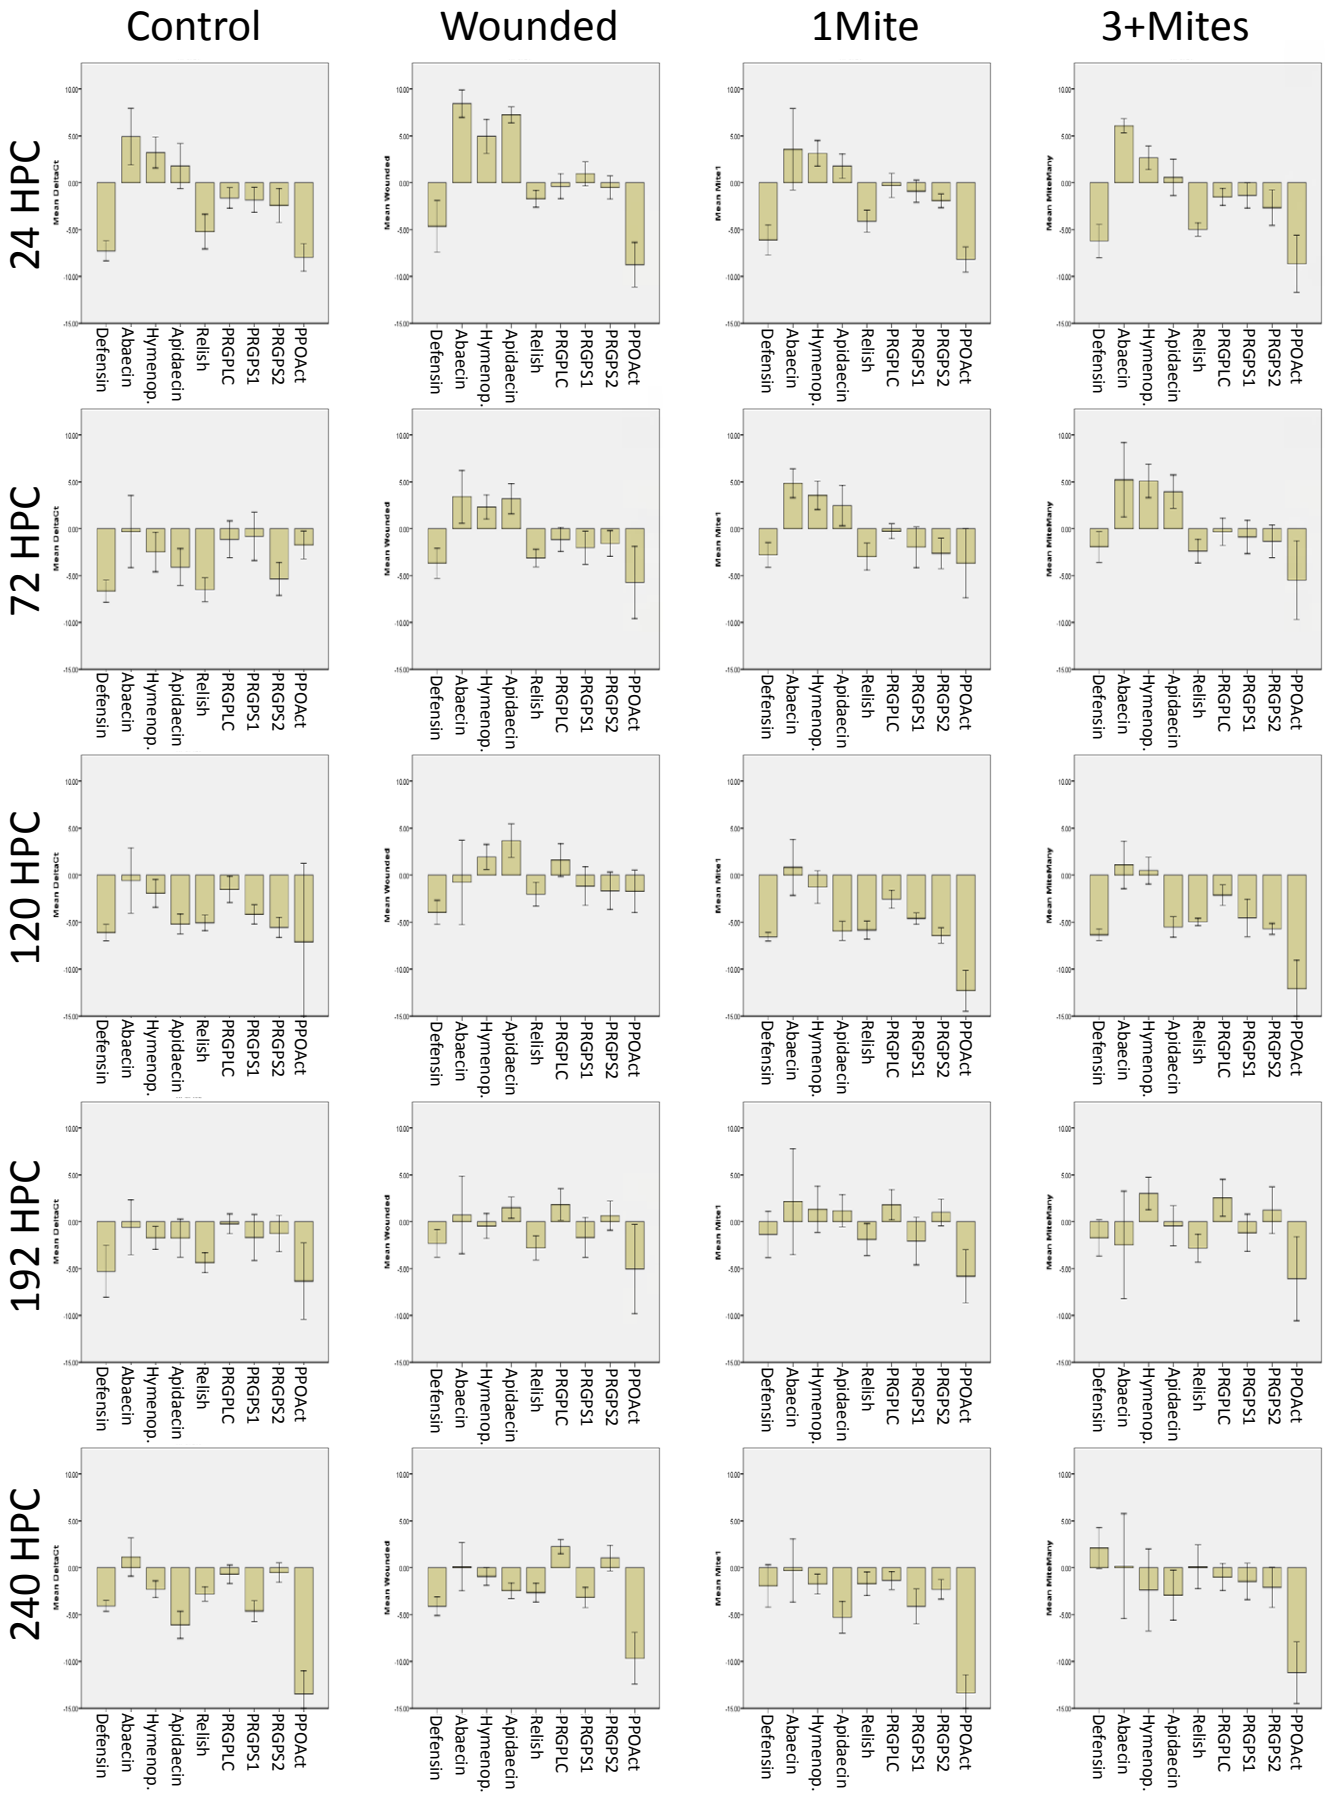

Fig. S2. Patterns of  $\Delta C_t$  values of immune genes relative to each other for any given time point and experimental group allows for visual inspection of the similarities across time and across experimental treatments.

Table S1. Overall, mixed-model ANOVA results for raw  $C_t$  values of all studied transcripts

| Transcript        | Factor                       | Result                                                 |
|-------------------|------------------------------|--------------------------------------------------------|
| Abaecin           | Treatment                    | <b><math>F_{(3,7.9)} = 4.3, p = 0.045</math></b>       |
|                   | Timepoint                    | <b><math>F_{(4,11)} = 14.8, p &lt; 0.001</math></b>    |
|                   | Hive                         | $F_{(2,2.3)} = 13.6, p = 0.055$                        |
|                   | Treatment x Timepoint        | $F_{(12,28.3)} = 1.9, p = 0.075$                       |
|                   | Treatment x Hive             | $F_{(6,27.3)} = 10.0, p = 0.460$                       |
|                   | Timepoint x Hive             | $F_{(8,25)} = 0.8, p = 0.647$                          |
|                   | Treatment x Timepoint x Hive | $F_{(22,151)} = 0.8, p = 0.704$                        |
| $\alpha$ -Tubulin | Treatment                    | <b><math>F_{(3,7.7)} = 6.1, p = 0.020</math></b>       |
|                   | Timepoint                    | <b><math>F_{(4,11.8)} = 15.8, p &lt; 0.001</math></b>  |
|                   | Hive                         | $F_{(2,4.1)} = 4.7, p = 0.087$                         |
|                   | Treatment x Timepoint        | <b><math>F_{(12,31.5)} = 6.5, p &lt; 0.001</math></b>  |
|                   | Treatment x Hive             | $F_{(6,29.9)} = 1.5, p = 0.206$                        |
|                   | Timepoint x Hive             | $F_{(8,26.5)} = 0.9, p = 0.552$                        |
|                   | Treatment x Timepoint x Hive | $F_{(22,151)} = 0.6, p = 0.945$                        |
| Apidaecin         | Treatment                    | <b><math>F_{(3,8.1)} = 15.6, p = 0.001</math></b>      |
|                   | Timepoint                    | <b><math>F_{(4,9.8)} = 105.4, p &lt; 0.001</math></b>  |
|                   | Hive                         | $F_{(2,5.2)} = 0.7, p = 0.529$                         |
|                   | Treatment x Timepoint        | <b><math>F_{(12,29.9)} = 11.4, p &lt; 0.001</math></b> |
|                   | Treatment x Hive             | $F_{(6,28.6)} = 1.0, p = 0.417$                        |
|                   | Timepoint x Hive             | $F_{(8,25.7)} = 1.5, p = 0.198$                        |
|                   | Treatment x Timepoint x Hive | $F_{(22,151)} = 0.7, p = 0.870$                        |
| Defensin2         | Treatment                    | <b><math>F_{(3,8.5)} = 16.6, p = 0.001</math></b>      |
|                   | Timepoint                    | $F_{(4,9.3)} = 1.9, p = 0.198$                         |
|                   | Hive                         | $F_{(2,3.2)} = 0.3, p = 0.764$                         |
|                   | Treatment x Timepoint        | <b><math>F_{(12,27.1)} = 3.0, p = 0.009</math></b>     |
|                   | Treatment x Hive             | $F_{(6,26.3)} = 0.6, p = 0.706$                        |
|                   | Timepoint x Hive             | $F_{(8,24.4)} = 1.4, p = 0.251$                        |
|                   | Treatment x Timepoint x Hive | $F_{(22,151)} = 1.0, p = 0.462$                        |
| DWV               | Treatment                    | <b><math>F_{(3,7.1)} = 10.8, p = 0.005</math></b>      |
|                   | Timepoint                    | $F_{(4,8.8)} = 1.8, p = 0.212$                         |
|                   | Hive                         | $F_{(2,9.7)} = 0.1, p = 0.892$                         |
|                   | Treatment x Timepoint        | $F_{(12,31.0)} = 0.9, p = 0.542$                       |
|                   | Treatment x Hive             | $F_{(6,29.5)} = 2.2, p = 0.069$                        |
|                   | Timepoint x Hive             | <b><math>F_{(8,26.2)} = 3.7, p = 0.005</math></b>      |
|                   | Treatment x Timepoint x Hive | $F_{(22,151)} = 0.6, p = 0.929$                        |
| Hymenoptaecin     | Treatment                    | <b><math>F_{(3,7.5)} = 9.2, p = 0.007</math></b>       |
|                   | Timepoint                    | <b><math>F_{(4,9.5)} = 36.2, p &lt; 0.001</math></b>   |
|                   | Hive                         | $F_{(2,5.0)} = 1.5, p = 0.309$                         |
|                   | Treatment x Timepoint        | <b><math>F_{(12,27.9)} = 5.0, p &lt; 0.001</math></b>  |
|                   | Treatment x Hive             | $F_{(6,27.0)} = 1.2, p = 0.339$                        |
|                   | Timepoint x Hive             | $F_{(8,24.8)} = 1.4, p = 0.263$                        |
|                   | Treatment x Timepoint x Hive | $F_{(22,151)} = 0.9, p = 0.635$                        |
| PGRP-LC           | Treatment                    | $F_{(3,9.0)} = 3.5, p = 0.065$                         |
|                   | Timepoint                    | <b><math>F_{(4,9.7)} = 12.2, p = 0.001</math></b>      |
|                   | Hive                         | $F_{(2,3.2)} = 2.4, p = 0.231$                         |
|                   | Treatment x Timepoint        | <b><math>F_{(12,28.6)} = 6.5, p &lt; 0.001</math></b>  |
|                   | Treatment x Hive             | $F_{(6,27.5)} = 0.7, p = 0.680$                        |
|                   | Timepoint x Hive             | $F_{(8,25.1)} = 1.3, p = 0.278$                        |
|                   | Treatment x Timepoint x Hive | $F_{(22,151)} = 0.8, p = 0.741$                        |

|         |                              |                                                  |
|---------|------------------------------|--------------------------------------------------|
| PGRP-S1 | Treatment                    | <b>F<sub>(3,8.0)</sub> = 4.3, p = 0.043</b>      |
|         | Timepoint                    | <b>F<sub>(4,11.3)</sub> = 21.2, p &lt; 0.001</b> |
|         | Hive                         | F <sub>(2,2.6)</sub> = 1.7, p = 0.330            |
|         | Treatment x Timepoint        | F <sub>(12,29.2)</sub> = 1.9, p = 0.072          |
|         | Treatment x Hive             | F <sub>(6,28.0)</sub> = 1.1, p = 0.413           |
|         | Timepoint x Hive             | F <sub>(8,25.4)</sub> = 0.8, p = 0.625           |
|         | Treatment x Timepoint x Hive | F <sub>(22,151)</sub> = 0.7, p = 0.813           |
| PGRP-S2 | Treatment                    | F <sub>(3,13.0)</sub> = 1.5, p = 0.254           |
|         | Timepoint                    | <b>F<sub>(4,13.7)</sub> = 17.0, p &lt; 0.001</b> |
|         | Hive                         | F <sub>(2,0.1)</sub> = 23.2, p = 0.663           |
|         | Treatment x Timepoint        | <b>F<sub>(12,31.9)</sub> = 5.0, p &lt; 0.001</b> |
|         | Treatment x Hive             | F <sub>(6,30.3)</sub> = 0.4, p = 0.850           |
|         | Timepoint x Hive             | F <sub>(8,26.6)</sub> = 0.6, p = 0.750           |
|         | Treatment x Timepoint x Hive | F <sub>(22,151)</sub> = 0.5, p = 0.956           |
| PPOAct  | Treatment                    | F <sub>(3,6.5)</sub> = 2.7, p = 0.130            |
|         | Timepoint                    | <b>F<sub>(4,8.7)</sub> = 10.7, p = 0.002</b>     |
|         | Hive                         | F <sub>(2,6.3)</sub> = 0.7, p = 0.512            |
|         | Treatment x Timepoint        | F <sub>(12,25.2)</sub> = 1.7, p = 0.123          |
|         | Treatment x Hive             | F <sub>(6,24.7)</sub> = 2.0, p = 0.106           |
|         | Timepoint x Hive             | F <sub>(8,23.5)</sub> = 1.5, p = 0.222           |
|         | Treatment x Timepoint x Hive | F <sub>(22,151)</sub> = 1.6, p = 0.054           |
| Relish  | Treatment                    | <b>F<sub>(3,8.5)</sub> = 9.8, p = 0.004</b>      |
|         | Timepoint                    | <b>F<sub>(4,10.2)</sub> = 10.2, p = 0.001</b>    |
|         | Hive                         | F <sub>(2,2.5)</sub> = 2.8, p = 0.231            |
|         | Treatment x Timepoint        | <b>F<sub>(12,28.3)</sub> = 4.4, p = 0.001</b>    |
|         | Treatment x Hive             | F <sub>(6,27.2)</sub> = 0.8, p = 0.615           |
|         | Timepoint x Hive             | F <sub>(8,25.0)</sub> = 1.0, p = 0.457           |
|         | Treatment x Timepoint x Hive | F <sub>(22,151)</sub> = 0.8, p = 0.691           |
| RPS5a   | Treatment                    | <b>F<sub>(3,8.0)</sub> = 14.2, p = 0.001</b>     |
|         | Timepoint                    | <b>F<sub>(4,33.6)</sub> = 65.7, p &lt; 0.001</b> |
|         | Hive                         | F <sub>(2,0.5)</sub> = 3.1, p = 0.545            |
|         | Treatment x Timepoint        | <b>F<sub>(12,30.0)</sub> = 6.8, p &lt; 0.001</b> |
|         | Treatment x Hive             | F <sub>(6,28.7)</sub> = 1.1, p = 0.378           |
|         | Timepoint x Hive             | F <sub>(8,25.8)</sub> = 0.1, p = 0.996           |
|         | Treatment x Timepoint x Hive | F <sub>(22,151)</sub> = 0.7, p = 0.877           |
